# Supplementary material
Source: Springer Nature journal article supplement (https://www.springermedizin.de/resource/supplementary/13075_2010_3035_MOESM12_ESM.pdf/9693626)

**(a)**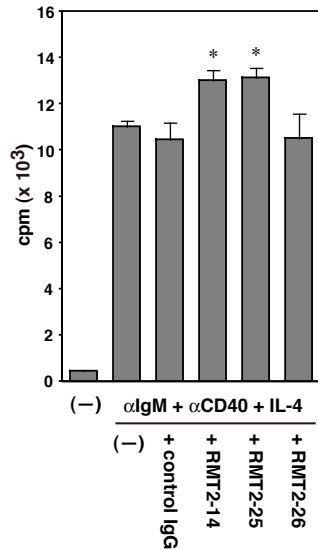**(b)**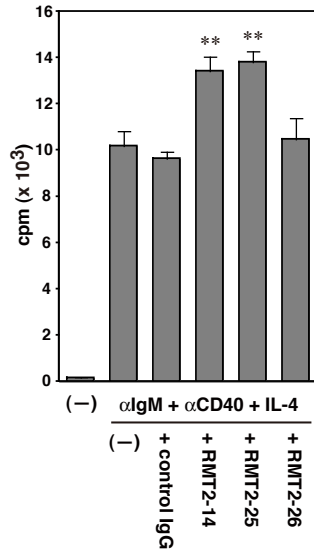**(c)**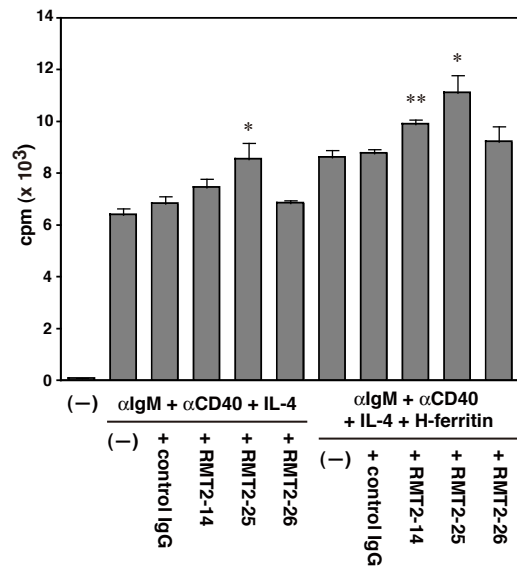

Supplement: MOESM12 [file 9693626]
